# Supplementary material
Source: HighWire-hosted journal article supplement (https://www.highwirestage.com/highwire/filestream/66331/field_highwire_adjunct_files/0/18-01064.pdf)
Supplement: 18-01064.pdf [file 18-01064.pdf]

**On-line Table 1: Clinical symptoms before and after shunt surgery<sup>a</sup>**

|                                   | Preop          | Postop          | P Value <sup>b</sup> |
|-----------------------------------|----------------|-----------------|----------------------|
| MMSE                              | 24 (20.5–27.5) | 25.5 (23.75–29) | NS                   |
| Urgency incontinence scale        | 4 (2.5–4.5)    | 3 (2–4)         | NS                   |
| TUG (sec)                         | 19 (16–43)     | 17 (14–28)      | <.05                 |
| TUG (No. of steps)                | 27 (21–49)     | 21 (17–37)      | <.01                 |
| 10 Meter Walk Test (sec)          | 12 (9–17)      | 11 (9–14)       | <.05                 |
| 10 Meter Walk Test (No. of steps) | 24 (17–32)     | 21 (17–27)      | <.01                 |
| Quantitative gait tests           | 20 (16–36)     | 18 (14–28)      | <.001                |

**Note:**—Preop indicates preoperative; Postop, postoperative; NS, not significant.

<sup>a</sup> Quantitative gait tests are the mean of the number of steps and seconds for both the 10 Meter Walk Test and TUG. Preoperative investigation was performed 1 or 2 days before the operation; and postoperative investigation, 3 months after the operation. All data are median with IQR.

<sup>b</sup> Wilcoxon signed rank test.

**On-line Table 2: Correlations between aqueductal cerebral stroke volume and ventricular volume in controls and patients**

|                  | ACSV ( $\mu$ L)    | Lateral Ventricular Volume (mL) | Spearman $\rho$ | P Value |
|------------------|--------------------|---------------------------------|-----------------|---------|
| Healthy controls | 62.5 (58.3–73.8)   | 31.2 (23.7–54.3)                | 0.46            | <.05    |
| Patients         | 103.5 (69.8–142.8) | 130.2 (110.6–136)               | 0.04            | NS      |

**Note:**—NS indicates not significant.
